# Supplementary material for: Analysis of factors influencing gastric emptying in upper gastrointestinal bleeding patients: a prospective multifactorial study using gastric residual volume grading
Source: Research Square preprint supplement (doi:10.21203/rs.3.rs-7432454/v1), 2025-12-30
Supplement: Supplementary file 1 [file 17b73c201ef98dae0067ffb9.docx]

**Table 3. Results of multiple factor analysis (ordered logistics regression)**

| variables | OR(95%CI) | P-value |
| --- | --- | --- |
| Age(year) | 1.297(0.692,2.433) | 0.417 |
| Sex(women) | 0.395(0.149,1.049) | 0.062 |
| Interval time between eating and examination(hour) | 0.073(0.021,0.249) | <0.001 |
| Diabetes | 6.910(2.311,20.664) | 0.001 |
| History of gastrointestinal surgery | 3.456(1.181,10.116) | 0.024 |
| History of liver cirrhosis | 3.776(1.342,10.630) | 0.011 |
