# Supplementary material for: Analysis of factors influencing gastric emptying in upper gastrointestinal bleeding patients: a prospective multifactorial study using gastric residual volume grading
Source: Research Square preprint supplement (doi:10.21203/rs.3.rs-7432454/v1), 2025-12-30
Supplement: Supplementary file 2 [file 2222c1b33671cb008bbe952a.docx]

**Table 2. Results of univariate analysis**

| variables | Gastric Residue Level 1 Group（n=55） | Gastric Residue Level 2 Group（n=13） | Gastric Residue Level 3 Group（n=13） | Gastric Residue Level 4 Group （n=19） | P-value |
| --- | --- | --- | --- | --- | --- |
| Sex  Male  Female | 32  23 | 8  5 | 8  5 | 10  9 | 0.957 |
| Age(year) | 58±12 | 66±11 | 59±12 | 64±13 | 0.117 |
| Interval time between eating and examination(hour) | 81(32-152.5) | 78(34-95) | 33.5(25-52) | 13.5(8-22) | <0.001 |
| Diabetes  yes  no | 6  49 | 4  9 | 6  7 | 12  7 | <0.001 |
| History of liver cirrhosis  yes  no  History of gastrointestinal surgery  yes  no | 45  10  11  44 | 6  7  5  8 | 8  5  5  8 | 12  7  8  11 | 0.037  0.152 |
