# Supplementary material for: Analysis of factors influencing gastric emptying in upper gastrointestinal bleeding patients: a prospective multifactorial study using gastric residual volume grading
Source: Research Square preprint supplement (doi:10.21203/rs.3.rs-7432454/v1), 2025-12-30
Supplement: Supplementary file 3 [file 7745db8f283866fd41088a41.docx]

| **Characteristic** | Gastric Residue Level 1 Group（n=55） | Gastric Residue Level 2 Group（n=13） | Gastric Residue Level 3 Group（n=13） | Gastric Residue Level 4 Group （n=19） | P-value |
| --- | --- | --- | --- | --- | --- |
| BMI  RBC (1012/L)  HB (g/dL)  WBC (109/L)  Neutrophil (109/L)  PLT | 22.4±3.7  2.7(2.1-3.5)  72(59-93)  8.9(6.7-10.0)  7.5(5.6-8.5)  90(69-187) | 22.5±3.3  2.3(2.0-2.9)  74(58-91)  10.0(5.6-15.1)  9.1(4.4-13.8)  135(103-173) | 23.0±2.3  2.5(2.0-2.9)  76(56-84)  6.2(4.9-12.6)  4.8(3.5-11.0)  105(68-204) | 22.7±4.4  2.9(1.8-3.0)  76(55-91)  10.6(5.5-13.8)  9.0(4.4-12.1)  115(63-176) | 0.793  0.654  0.936  0.547  0.305  0.673 |
| Albumin (g/dL) | 34.0(29.6-36.7) | 30.1(26.5-32.9) | 29.7(27.9-32.6) | 32.8(26.3-35.1) | 0.070 |
| PT(sec) | 13.3(12.3-14.4) | 13.8(11.8-15.2) | 13.5(12.6-17.6) | 13.6(12.2-16.0） | 0.682 |
| INR | 1.15(1.06-1.25) | 1.2(1.0-1.3) | 1.2(1.1-1.5) | 1.2(1.1-1.4) | 0.636 |
| Creatinine | 69.9(59-83.8) | 86.2(60.7-104.8) | 75(64.5-94.2) | 85.3(74.3-142) | 0.055 |
| BUN | 69.9(59-83.8) | 86.2(60.7-104.8) | 75(64.5-94.2) | 85.3(74.3-142) | 0.176 |
| TBIL | 18.8(11.9-27.6) | 12.8(8.2-37.1) | 23.4(12.4-33.1) | 23.0(10.2-38.8) | 0.830 |
| DBIL | 6.8(4.5-9.5) | 5.3(2.5-12.0) | 8.8(3.5-16.0) | 7.6(4.0-16.6) | 0.728 |
| Etiology  Cirrhosis esophagogastric varices  peptic ulcer  other | 47  7  1 | 7  6  0 | 9  2  2 | 13  1  1 | 0.073 |

**Table 1. Baseline Characteristics of the Patients.**

Data are expressed as mean ± standard deviation or median (range); categorical data are presented as number or percentage of patients. HBV: hepatitis B virus; HCV: hepatitis C virus; BMI: body mass index; RBC: red blood cell; HB: hemoglobin; WBC: white blood cell; PLT: blood platelet; PT: prothrombin time; INR: international normalized ratio; BUN: blood urea nitrogen; TBIL: total bilirubin; DBIL: direct bilirubin; other: vascular malformation.
